# Supplementary material
Source: PubMed Central journal article supplement (PMC9906998)
Supplement: mmc1.pdf [file mmc1.pdf]

**Cell Reports, Volume 42**

**Supplemental information**

**Durability of neutralization**

**against Omicron subvariants**

**after vaccination and breakthrough infection**

**Ka-Li Zhu, Xiao-Lin Jiang, Bing-Dong Zhan, Xue-Jun Wang, Xian Xia, Guo-Ping Cao, Wen-Kui Sun, Peng-Xiang Huang, Jin-Zhong Zhang, Yu-Ling Gao, Er-Hei Dai, Hui-Xia Gao, and Mai-Juan Ma**

**Table S1. Mutations in spike protein of variants used in the study, related to STAR Methods.**

| <b>Variants</b>  | <b>Mutations</b>                                                                                                                                                                                                                                   |
|------------------|----------------------------------------------------------------------------------------------------------------------------------------------------------------------------------------------------------------------------------------------------|
| <b>BA.1</b>      | A67V, Δ69-70, T95I, G142D, Δ143-145, Δ211, L212I, 214EPE, G339D, S371L, S373P, S375F, K417N, N440K, G446S, S477N, T478K, E484A, Q493R, G496S, Q498R, N501Y, Y505H, T547K, D614G, H655Y, N679K, P681H, N764K, D796Y, N856K, Q954H, N969K, L981F     |
| <b>BA.2</b>      | T19I, Δ24-26, A27S, G142D, V213G, G339D, S371F, S373P, S375F, T376A, D405N, R408S, K417N, N440K, S477N, T478K, E484A, Q493R, Q498R, N501Y, Y505H, D614G, H655Y, N679K, P681H, N764K, D796Y, Q954H, N969K                                           |
| <b>BA.2.75</b>   | T19I, Δ24-26, A27S, G142D, K147E, W152R, F157L, I210V, V213G, G257S, G339H, S371F, S373P, S375F, T376A, D405N, R408S, K417N, N440K, G446S, N460K, S477N, T478K, E484A, Q498R, N501Y, Y505H, D614G, H655Y, N679K, P681H, N764K, D796Y, Q954H, N969K |
| <b>BA.4/BA.5</b> | T19I, Δ24-26, A27S, Δ69-70, G142D, V213G, G339D, S371F, S373P, S375F, T376A, D405N, R408S, K417N, N440K, L452R, S477N, T478K, E484A, F486V, Q498R, N501Y, Y505H, D614G, H655Y, N679K, P681H, N764K, D796Y, Q954H, N969K                            |
| <b>BF.7</b>      | T19I, Δ24-26, A27S, Δ69-70, G142D, V213G, G339D, R346T, S371F, S373P, S375F, T376A, D405N, R408S, K417N, N440K, L452R, S477N, T478K, E484A, F486V, Q498R, N501Y, Y505H, D614G, H655Y, N679K, P681H, N764K, D796Y, Q954H, N969K                     |
| <b>BQ.1.1</b>    | T19I, Δ24-26, A27S, Δ69-70, G142D, V213G, G339D, R346T, S371F, S373P, S375F, T376A, D405N, R408S, K417N, N440K, K444T, L452R, N460K, S477N, T478K, E484A, F486V, Q498R, N501Y, Y505H, D614G, H655Y, P681H, N679K, N764K, D796Y, Q954H, N969K       |
| <b>XBB</b>       | T19I, Δ24-26, A27S, V83A, G142D, Δ144, H146K, Q183E, V213E,                                                                                                                                                                                        |

---

G339H, R346T, L368I, S371F, S373P, S375F, T376A, D405N, R408S,  
K417N, N440K, V445P, G446S, N460K, S477N, T478K, E484A,  
F486S, F490S, Q498R, N501Y, Y505H, D614G, H655Y, N679K,  
P681H, N764K, D796Y, Q954H, N969K

---
